# Supplementary material for: Efficacy of DYRK1A inhibitors in novel models of Down syndrome acute lymphoblastic leukemia
Source: PubMed Central journal article supplement — Haematologica. 2024 Feb 29;109(7):2309–15. doi: 10.3324/haematol.2023.284271 (PMC11215345; doi:10.3324/haematol.2023.284271), 2024-02-29
Supplement: 2023_284271_CAREY-SMITH_SUPPL.pdf [file 2023_284271_CAREY-SMITH_SUPPL.pdf]

# Efficacy of DYRK1A inhibitors in novel models of Down syndrome acute lymphoblastic leukemia

## Authors

---

Shannon L. Carey-Smith,<sup>1,2\*</sup> Maryam H. Simad,<sup>1\*</sup> Kunjal Panchal,<sup>1,2</sup> Carlos Aya-Bonilla,<sup>1</sup> Hannah Smolders,<sup>1</sup> Sang Lin,<sup>1</sup> Jesse D. Armitage,<sup>1</sup> Vivien T. Nguyen,<sup>1</sup> Kathryn Bentley,<sup>1</sup> Jette Ford,<sup>1</sup> Sajla Singh,<sup>1</sup> Joyce Oommen,<sup>1</sup> Anouchka P. Laurent,<sup>3</sup> Thomas Mercher,<sup>3</sup> John D. Crispino,<sup>4</sup> Andrew P. Montgomery,<sup>5</sup> Michael Kassiou,<sup>5</sup> Thierry Besson,<sup>6</sup> Emmanuel Deau,<sup>7</sup> Laurent Meijer,<sup>7</sup> Laurence C. Cheung,<sup>1,2,8</sup> Rishi S. Kotecha,<sup>1,2,9,10</sup> and Sébastien Malinge<sup>1,2,10</sup>

<sup>1</sup>Telethon Kids Cancer Center, Telethon Kids Institute, Perth, Western Australia, Australia; <sup>2</sup>Curtin Medical School, Curtin University, Perth, Western Australia, Australia; <sup>3</sup>U1170 INSERM, Gustave Roussy, Villejuif, France; <sup>4</sup>Department of Hematology, St Jude Children's Hospital, Memphis, TN, USA; <sup>5</sup>School of Chemistry, University of Sydney, New

South Wales, Australia; <sup>6</sup>University Rouen Normandie, INSA Rouen Normandie, CNRS, COBRA UMR 6014, Rouen, France; <sup>7</sup>Perha Pharmaceuticals, Perharidy Peninsula, Roscoff, France; <sup>8</sup>Curtin Health Innovation Research Institute, Curtin University, Perth, Western Australia, Australia; <sup>9</sup>Department of Clinical Hematology, Oncology, Blood and Marrow Transplantation, Perth Children's Hospital, Perth, Western Australia, Australia and <sup>10</sup>University of Western Australia, Perth, Western Australia, Australia

*\*SLC-S and MHS contributed equally as first authors.*

Correspondence:

S. MALINGE - [sebastien.malinge@telethonkids.org.au](mailto:sebastien.malinge@telethonkids.org.au)

<https://doi.org/10.3324/haematol.2023.284271>

## **Efficacy of DYRK1A inhibitors in novel models of Down syndrome acute lymphoblastic leukemia**

Shannon L. Carey-Smith<sup>1,2,\*</sup>, Maryam H. Simad<sup>1\*</sup>, Kunjal Panchal<sup>1,2</sup>, Carlos Aya-Bonilla<sup>1</sup>, Hannah Smolders<sup>1</sup>, Sang Lin<sup>1</sup>, Jesse D. Armitage<sup>1</sup>, Vivien T. Nguyen<sup>1</sup>, Kathryn Bentley<sup>1</sup>, Jette Ford<sup>1</sup>, Sajla Singh<sup>1</sup>, Joyce Oommen<sup>1</sup>, Anouchka P. Laurent<sup>3</sup>, Thomas Mercher<sup>3</sup>, John D. Crispino<sup>4</sup>, Andrew P. Montgomery<sup>5</sup>, Michael Kassiou<sup>5</sup>, Thierry Besson<sup>6</sup>, Emmanuel Deau<sup>7</sup>, Laurent Meijer<sup>7</sup>, Laurence C. Cheung<sup>1,2,8</sup>, Rishi S. Kotecha<sup>1,2,9,10</sup> and Sébastien Malinge<sup>1,2,10</sup>

<sup>1</sup>Telethon Kids Cancer Centre, Telethon Kids Institute, Perth, WA, Australia

<sup>2</sup>Curtin Medical School, Curtin University, Perth, WA, Australia

<sup>3</sup>U1170 INSERM, Gustave Roussy, Villejuif, France

<sup>4</sup>Department of Hematology, St Jude Children`s Hospital, Memphis, TN, USA

<sup>5</sup>School of Chemistry, University of Sydney, NSW, Australia

<sup>6</sup>University Rouen Normandie, INSA Rouen Normandie, CNRS, COBRA UMR 6014, 76000 Rouen, France

<sup>7</sup>Perha Pharmaceuticals, Perharidy Peninsula, Roscoff, France

<sup>8</sup>Curtin Health Innovation Research Institute, Curtin University, Perth, WA, Australia

<sup>9</sup>Department of Clinical Haematology, Oncology, Blood and Marrow Transplantation, Perth Children`s Hospital, Perth, WA, Australia

<sup>10</sup>University of Western Australia, Perth, WA, Australia

\*SLCS and MHS contributed equally to the study

**Supplementary Figures and legends**

# Supplementary Figure 1

## A

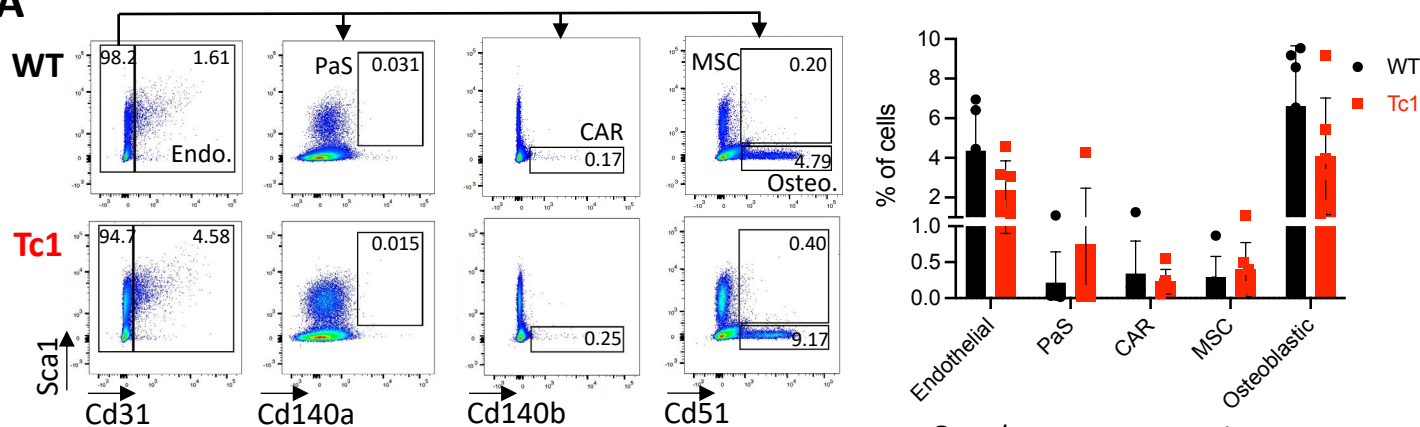

## B

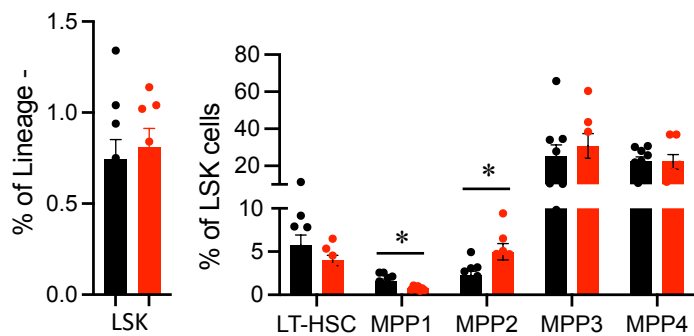

## C

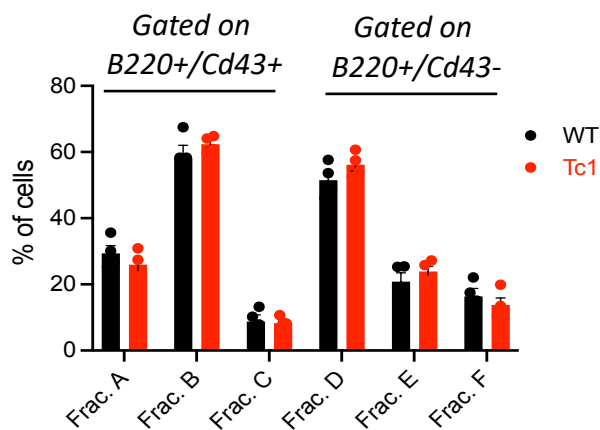

## D

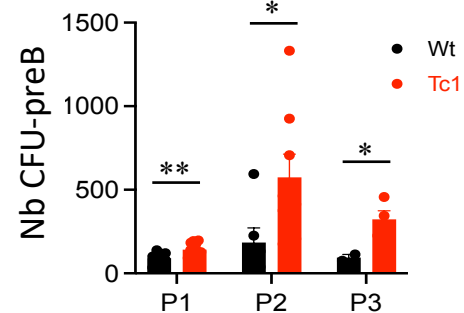

## E

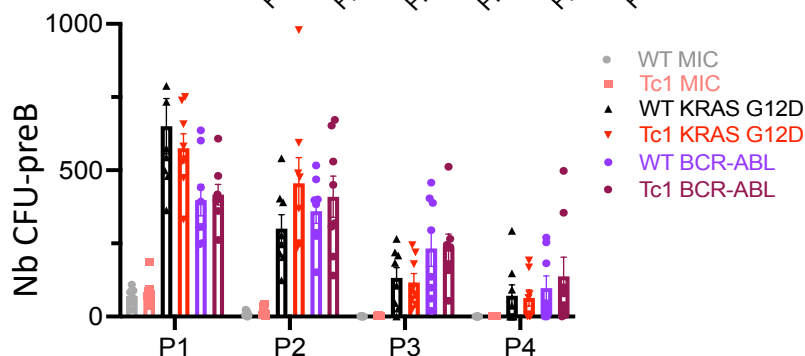

## F

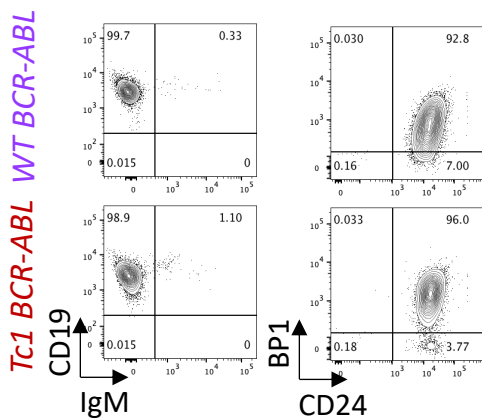

## G

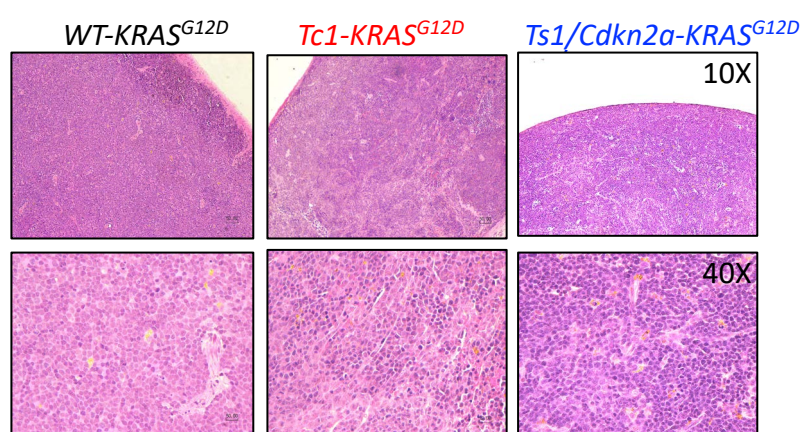

## H

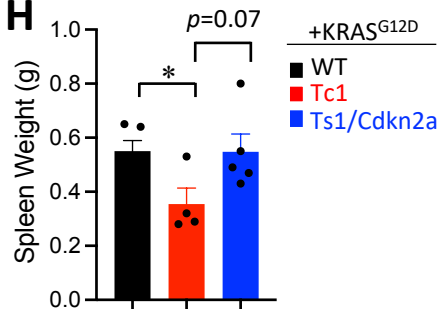

## I

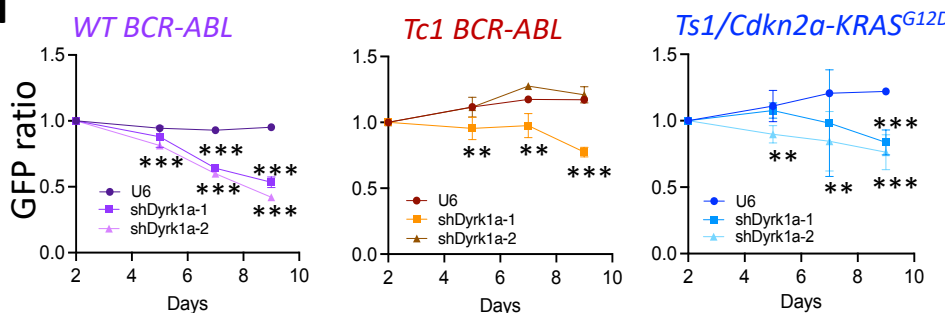

### Supplementary Figure 1: Establishment of murine DS-ALL cells.

**A.** Representative flow plots comparing the bone marrow stroma of 8-10 week old wild-type (WT) and trisomic (Tc1) mice, gated on CD45-Ter119- and depicting the percentage of endothelial cells (endo, CD31-positive), CD31-negative PaS (PDGFRa(Cd140a)+/Sca1+), Cxcl12-abundant reticular cells (CAR, PDGFRb(cd140b)+/Sca1-), mesenchymal stem cells (MSC, Sca1+/CD51+) and osteoblastic cells (osteo, Sca1-/CD51+). *Right panel:* box plot integrating all data (n=6). **B.** Bar graph displaying the percentage of the different hematopoietic stem cells and progenitors in 8-10 week old mice (n=7-9); \* $p < 0.05$ . LSK = Lineage-negative/Sca1+/Kit+, LT-HSC (Long-term hematopoietic stem cells, LSK+CD34-FLT3-CD150+CD48-), MPP1 (multipotent progenitor 1, LSK+CD34+FLT3-CD150+CD48-), MPP2 (LSK+CD34+FLT3-CD150+CD48+), MPP3 (LSK+CD34+FLT3-CD150-CD48+), MPP4 (LSK+CD34+FLT3+CD150-CD48+). **C.** Bar graph displaying the proportion of the hardy fraction in the bone marrow of WT and Tc1 mice (n=4); Fraction A (B220+CD43+CD24-BP1-), Fraction B (B220+CD43+CD24+BP1-), Fraction C (B220+CD43+CD24+BP1+), Fraction D (B220+CD43-IgM-IgD-), Fraction E (B220+CD43-IgM+IgD-) and Fraction F (B220+CD43-IgM+IgD+). **D.** Number of colony-forming unit (CFU)-preB colonies obtained from 8-10 week old WT and Tc1 donor bone marrow cells over 3 passages (n=8-9); \* $p < 0.05$ , \*\* $p < 0.01$ . **E.** Number of CFU-preB colonies obtained from sorted mCherry-positive bone marrow progenitor cells transduced with KRAS<sup>G12D</sup>, BCR-ABL retroviruses compared to empty vector retroviruses (MIC = MSCV-IRES-mCherry), over 4 passages (n=8). **F.** Phenotype of the WT-BCR-ABL and Tc1-BCR-ABL cell lines assessing surface expression of CD19, IgM, BP1 and CD24. **G.** Representative spleen sections from WT-KRAS<sup>G12D</sup>, Tc1-KRAS<sup>G12D</sup> and Ts1/cdkn2a-KRAS<sup>G12D</sup> primary recipients, stained with hematoxylin and eosin (10X and 40X magnification). **H.** Average spleen weight at endpoint in WT-KRAS<sup>G12D</sup> (n=5), Tc1-KRAS<sup>G12D</sup> (n=4) and Ts1/Cdkn2a-KRAS<sup>G12D</sup> (n=5) irradiated recipient mice; \* $p < 0.05$ . **I.** Ratio of GFP-expressing Banshee vectors encoding two shDyrk1a compared to empty Banshee-U6 counterparts over 9 days in the murine WT-BCR-ABL, Tc1-BCR-ABL and Ts1/cdkn2a-KRAS<sup>G12D</sup> cells (n=4 replicates); \*\* $p < 0.01$ , \*\*\* $p < 0.001$ .

# Supplementary Figure 2

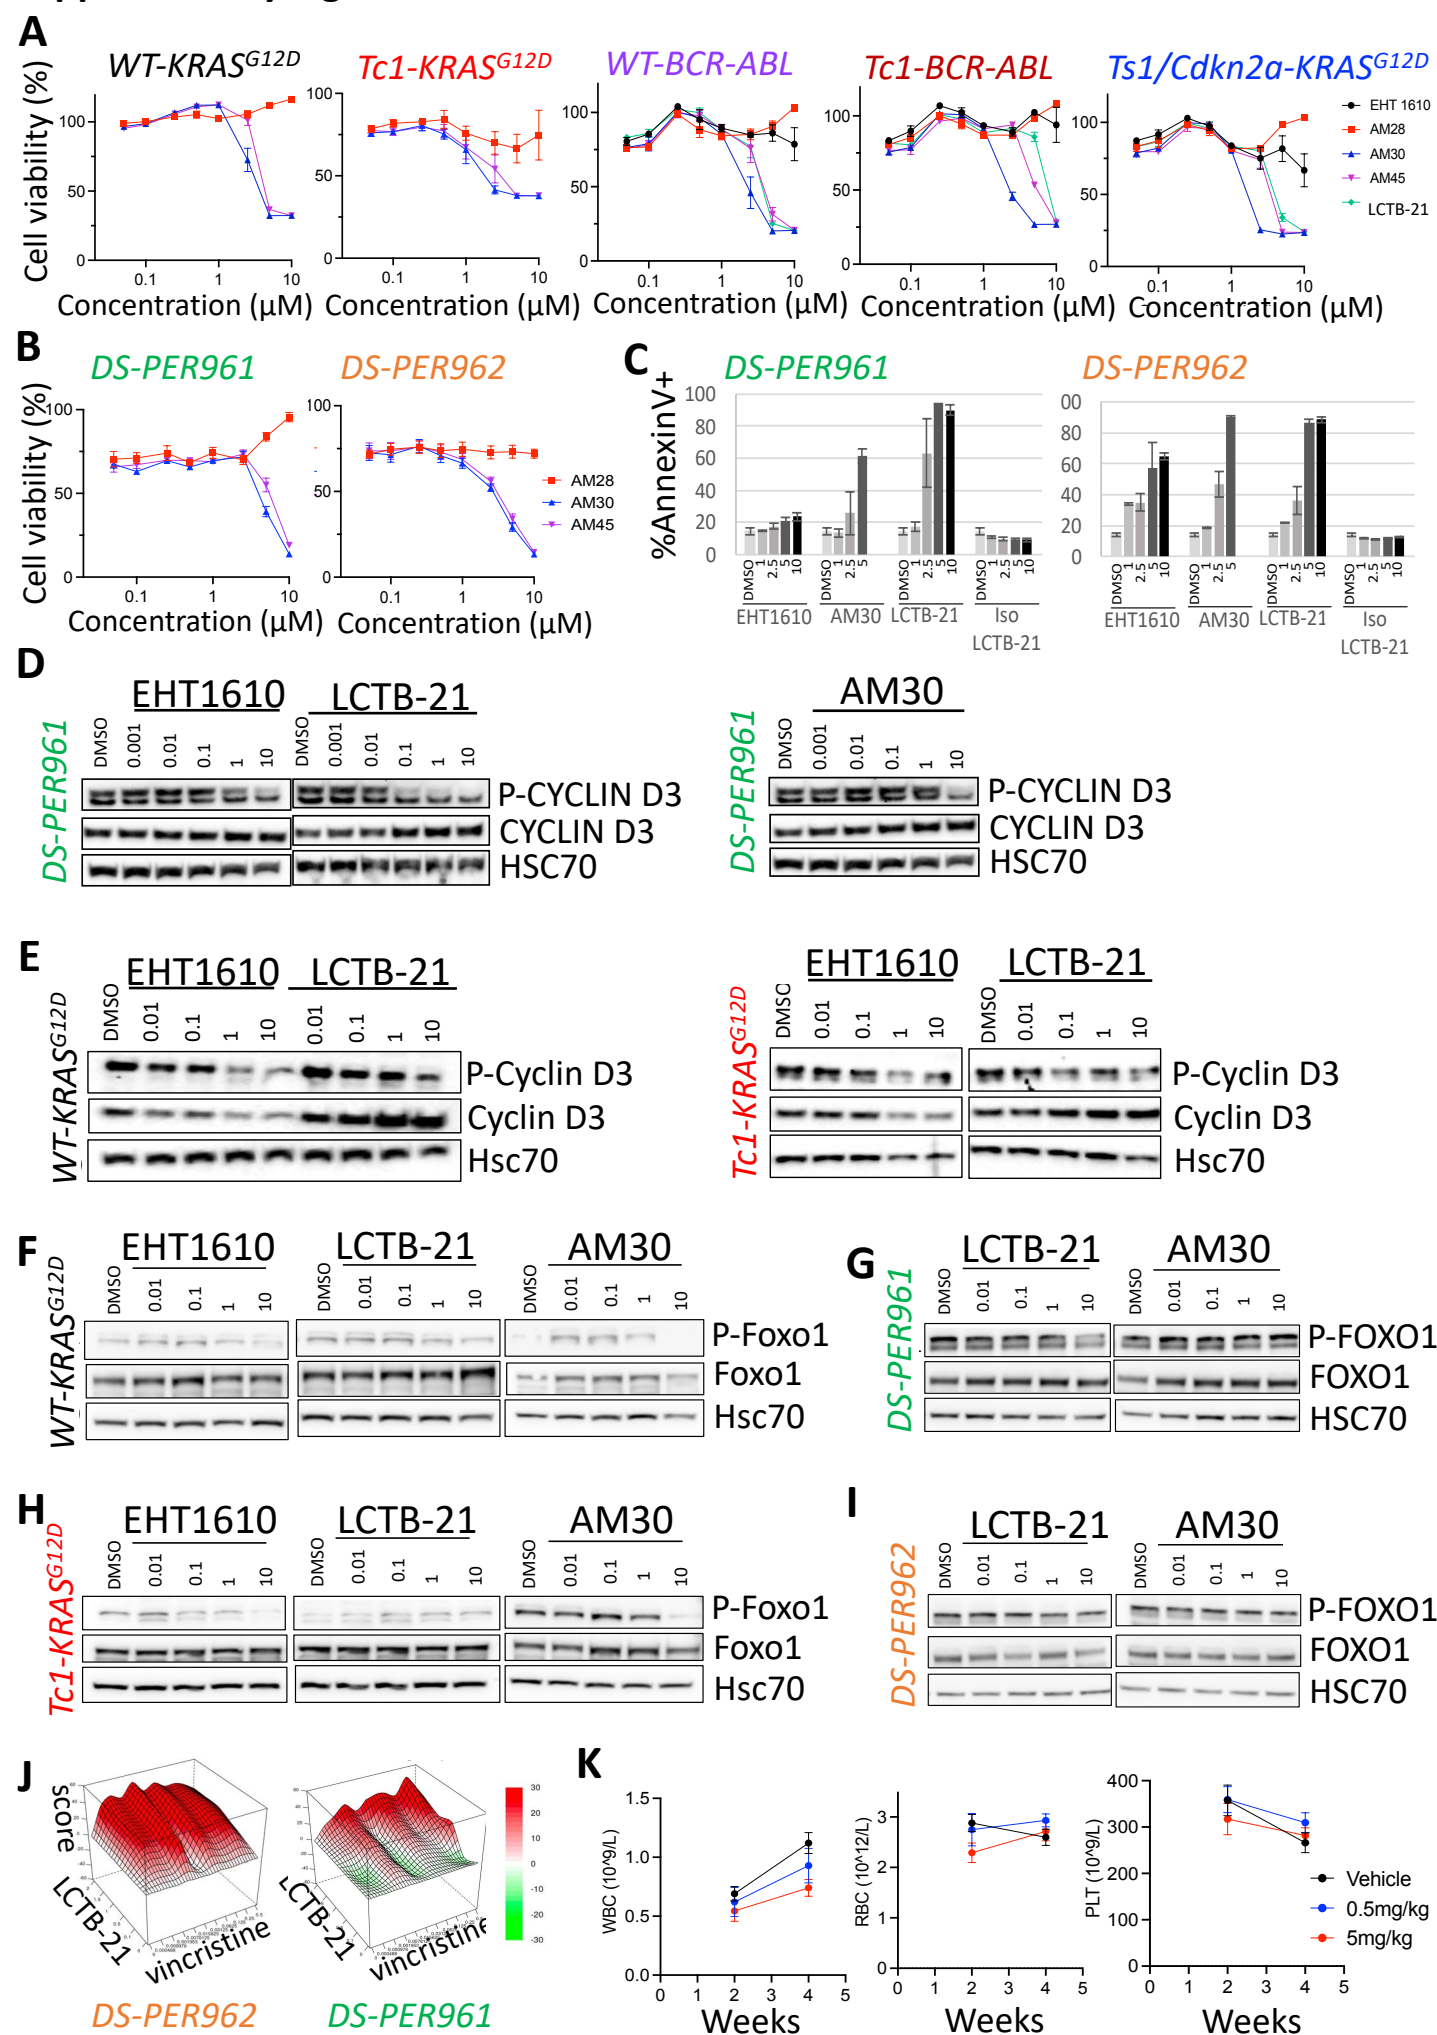

**Supplementary Figure 2: Preclinical testing of new DYRK1A inhibitors in non-DS and DS-ALL.**

**A.** Dose-response curves for EHT1610, Leucettinib-21 (LCTB-21), AM28, AM30 and AM45 in murine cell lines. **B.** Dose-response curves for AM28, AM30 and AM45 in human DS-PER961 and DS-PER962 cell lines. **C.** Bar graphs showing the impact of increasing doses 1 $\mu$ M, 2.5 $\mu$ M, 5 $\mu$ M and 10 $\mu$ M of the DYRK1A inhibitors EHT1610, AM30, LCTB-21 and its inactive isomer iso-Leucettinib-21 (Iso LCTB-21) on cell viability of DS-PER961 and DS-PER962 at 48 hours assessed by flow cytometry (AnnexinV-positive cells). **D.** Western blots of phospho-Cyclin D3 performed from protein extracted from the DS-PER961 human cell line after a 6 hour treatment with increasing doses (in  $\mu$ M) of the DYRK1A inhibitors EHT1610, Leucettinib-21 and AM30, compared to treatment with DMSO. **E.** Western blots of phospho-Cyclin D3 performed from protein extracted from WT-KRAS<sup>G12D</sup> and Tc1-KRAS<sup>G12D</sup> murine cells after a 6 hour treatment with increasing doses (in  $\mu$ M) of the DYRK1A inhibitors EHT1610 and Leucettinib-21, compared to treatment with DMSO. **F-I.** Assessment of FOXO1 (Ser326) phosphorylation in response to DYRK1A inhibition (6 hour treatment) in **(F)** murine WT-KRAS<sup>G12D</sup>, **(G)** human DS-PER961 (KRAS<sup>G12S</sup>), **(H)** murine Tc1-KRAS<sup>G12D</sup> and **(I)** human DS-PER962 (CRLF2-rearranged/JAK2<sup>I682F</sup>) cells. **J.** Representative plots showing synergy between LCTB-21 and vincristine in DS-PER962 and DS-PER961 cell lines. **K.** Blood count assessment showing WBC (white blood cell count), RBC (red blood cell count) and PLT (platelet counts) at week 2 and week 4 of treatment with 0.5 mg/kg and 5 mg/kg of Leucettinib-21 compared to vehicle in the DS06 patient-derived xenograft (n=3 per group and per timepoint).

# Supplementary Figure 3

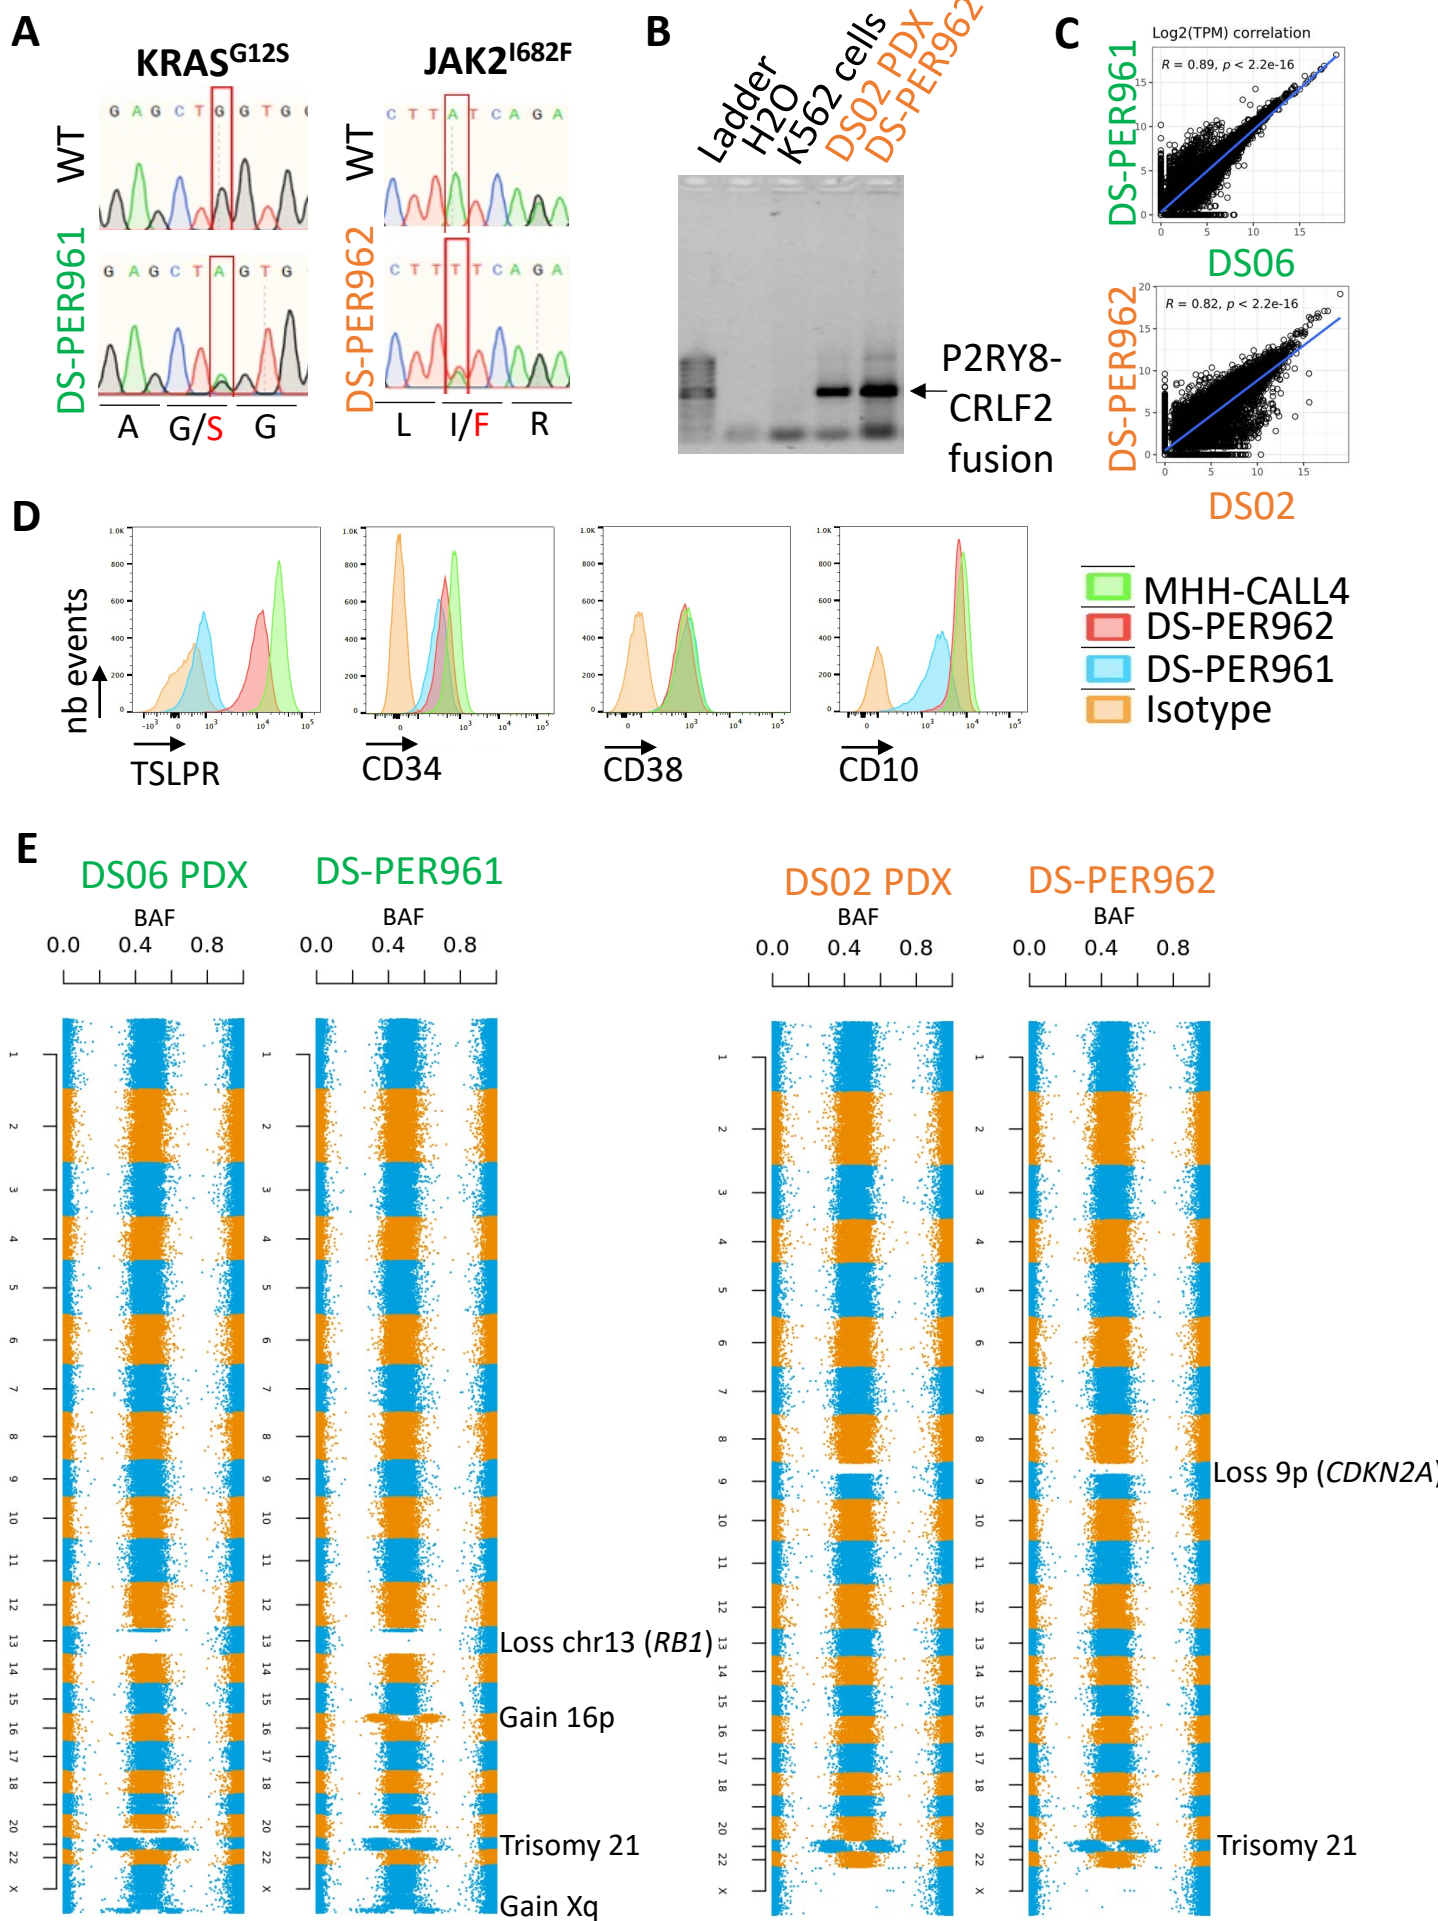

### Supplementary Figure 3: Characterization of human DS-ALL cell lines.

**A.** Sanger sequencing of genomic DNA confirming the presence of the *KRAS*<sup>G12S</sup> and *JAK2*<sup>I682F</sup> mutations found in the DS-PER961 and DS-PER962 cell lines respectively. **B.** Validation of the P2RY8-CRLF2 fusion transcript in the DS02 patient-derived xenograft (PDX) and DS-PER962 cell line compared to K562 control cells (primer sequences are indicated in supplemental table 2). **C.** Spearman correlation of the transcriptional profiles obtained in the DS-PER961 and DS-PER962 cell lines (Y-axis) compared to the PDX model they originate from (X-axis). RNA sequencing files are available via the Gene Expression Omnibus (GEO) database under the accession number GSE245056. **D.** Representative flow plots comparing the Mean Fluorescence Intensity (MFI) for the surface markers TSLPR, CD34, CD38 and CD10 in the DS-PER961 (in blue) and DS-PER962 (in red) compared to MHH-CALL4 cells (in green); isotypes are represented in orange. **E.** Bi-allelic frequencies obtained from SNP arrays (HumanCytoSNP-12 BeadChip (HumanCytoSNP-12v2.1; Illumina) comparing DS-PER961 and DS-PER962 cell lines with the PDX they originate from, showing that the cell lines are relatively stable at the genomic level.
